# Supplementary material for: The Two Arrows of Pain: Mechanisms of Pain Related to Meditation and Mental States of Aversion and Identification
Source: Springer Nature journal article supplement (doi:10.1007/s12671-021-01797-0), 2022-01-28
Supplement: MOESM1 [file 20074008]

# **Supplementary material**

## **Aversion and identification as pain regressors in the group of short-term meditators**

Beyond our main focus on the relationships between aversion and identification with pain in long-term meditators, we further tested the same relationships in the group of short-term meditators, relying on the same statistical approach described in the methods, that are reported below.

Be means of two separated models, we tested Aversion (Table 11) and Identification (Table 12) as pain regressors together with the meditation conditions (Condition). Results on the Aversion model showed a significant effect of Aversion in predicting pain ratings (χ2=1704.8701; p<0.0001; Table 11, Figure 11) with pain increasing together with aversion ratings. Results on the Identification model showed a main effect of Condition (χ2=55.7491; p<0.0001; Table 12, Figure 12), and a main effect of Identification (χ2=381.6219; p<0.0001; Table 12, Figure 12). Post-hoc comparisons on Condition showed a decrease in pain ratings for all the meditation conditions as compared to Rest, as well as a decrease in LKM when compared to FAM (Table 13). Finally, we found that Pain increased with Identification (Figure 13).

| Analysis of Deviance Table (Type III Wald chisquare tests) | | | |
| --- | --- | --- | --- |
| Response: Pain | Chisq | Df | Pr(>Chisq) |
| (Intercept) | 2.4610 | 1 | 0.11671 |
| Condition | 6.7575 | 3 | 0.08004 |
| **Aversion** | **1704.8701** | **1** | **< 2e-16 ***** |
| --- | | | |
| Signif. codes: 0 ‘***’ 0.001 ‘**’ 0.01 ‘*’ 0.05 ‘.’ 0.1 ‘ ’ 1 | | | |

**Table 11**. Analysis of deviance on pain ratings performed on the short-term meditators only, via a Type III Wald chisquare test. The Bold lines indicate significant results. Tested model: *Pain ~ Condition+ Aversion+ (Trial|Subj).*


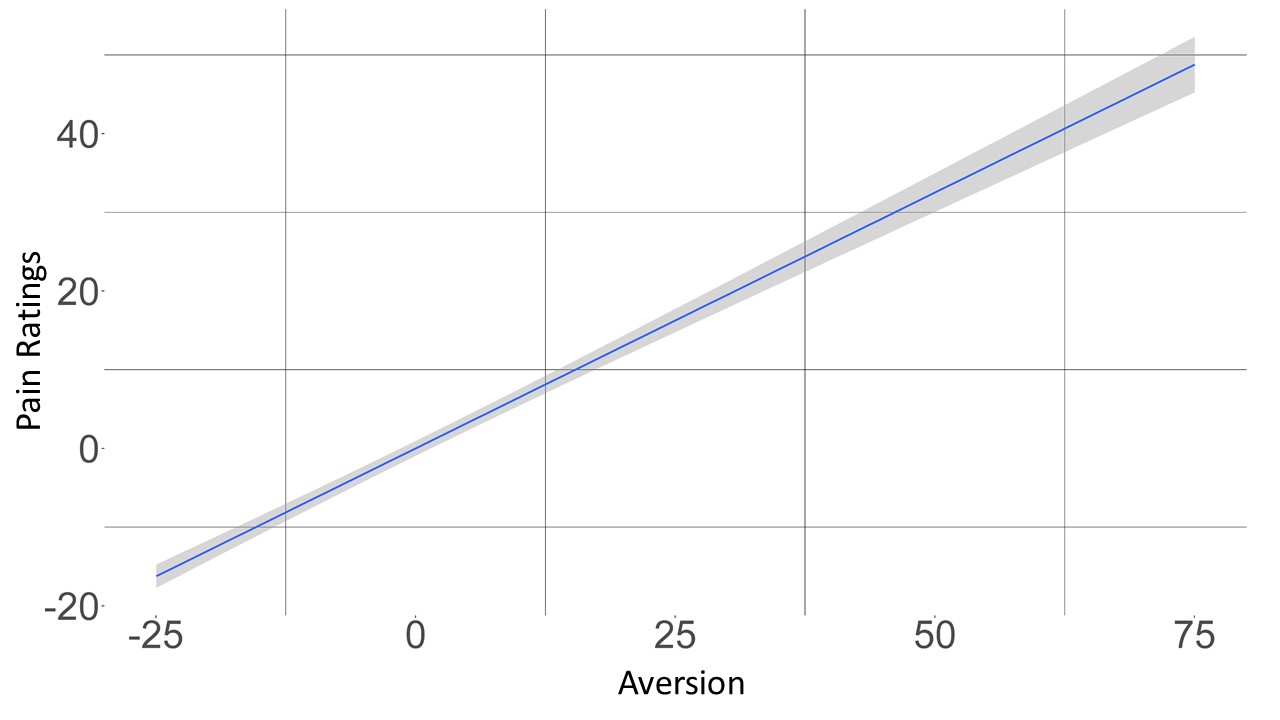


**Figure 11**. The graph shows that Pain is predicted by Aversion, as reported by the short-term meditators on a trial-by-trial basis. Pain significantly increased with Aversion. The grey area around the line represents the standard error.

| Analysis of Deviance Table (Type III Wald chisquare tests) | | | |
| --- | --- | --- | --- |
| Response: Pain | Chisq | Df | Pr(>Chisq) |
| (Intercept) | 1.9586 | 1 | 0.1617 |
| **Condition** | **55.7491** | **3** | **4.752e-12 ***** |
| **Identification** | **381.6219** | **1** | **< 2.2e-16 ***** |
| --- | | | |
| Signif. codes: 0 ‘***’ 0.001 ‘**’ 0.01 ‘*’ 0.05 ‘.’ 0.1 ‘ ’ 1 | | | |

**Table 12**. Analysis of deviance on pain ratings performed on the short-term meditators only, via a Type III Wald chisquare test. The Bold lines indicate significant results. Tested model: *Pain ~ Condition+ Identification+ (Trial|Subj).*

| Post-hoc comparisons | | | | | |
| --- | --- | --- | --- | --- | --- |
| contrast | estimate | SE | df | t.ratio | p.value |
| **REST - FAM** | **4.15** | **0.961** | **1422** | **4.316** | **0.0001** |
| **REST - OMM** | **5.30** | **0.969** | **1423** | **5.469** | **<.0001** |
| **REST - LKM** | **7.02** | **0.977** | **1424** | **7.179** | **<.0001** |
| FAM - OMM | 1.15 | 0.949 | 1420 | 1.210 | 0.6207 |
| **FAM - LKM** | **2.87** | **0.951** | **1420** | **3.015** | **0.0139** |
| OMM - LKM | 1.72 | 0.949 | 1420 | 1.812 | 0.2678 |

**Table 13**. Post-hoc comparisons for the main effect of Condition (Rest, FAM, OMM, LKM) tested on short-term meditators only. Bold indicate significant comparisons. P-values were adjusted according to the Tukey method to compare a group of four estimates.


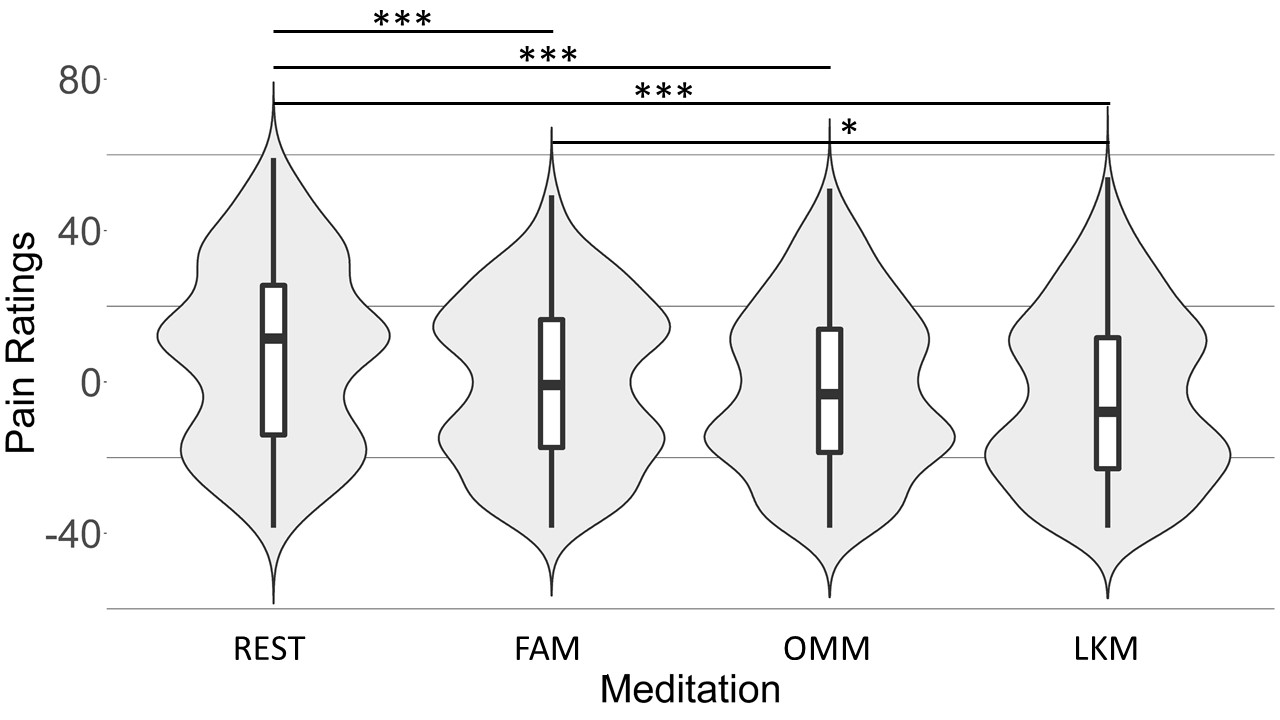


**Figure 12**. Significant effect of Condition (X-axis) on pain ratings (Y-axis) in short-term-meditators. Violin plots show the distribution of the dependent variable Pain, which is centered on the mean. Each plot shows the distribution density of the mean by subject for each condition. The central boxplot indicates the mean and standard deviation. The results show a significant pain decrease in LKM, FAM and OMM as compared to Rest, as well as a pain decrease in LKM as compared to FAM.


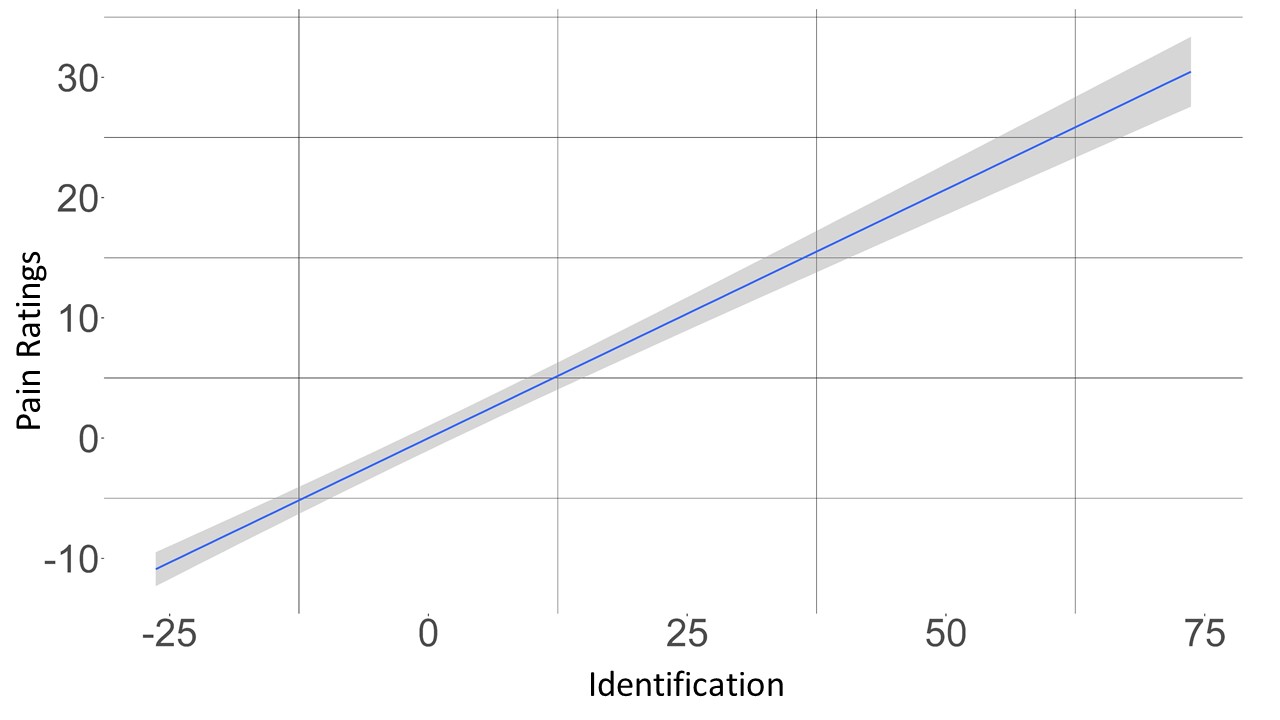


**Figure 13**. The graph shows that Pain is predicted by Identification, as reported by the short-term meditators on a trial-by-trial basis. Pain significantly increased with Aversion. The grey area around the line represents the standard error.
